# Supplementary material for: Radical reactivity of antiaromatic Ni(II) norcorroles with azo radical initiators
Source: publisher site journal article supplement (doi:10.3762/bjoc.20.172), 2024-08-12
Supplement: Additional file 1 [file 1860-5397-20-172-S1.pdf]

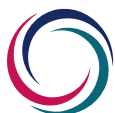

## Supporting Information

for

### Radical reactivity of antiaromatic Ni(II) norcorroles with azo radical initiators

Siham Asyiqin Shafie, Ryo Nozawa, Hideaki Takano and Hiroshi Shinokubo

*Beilstein J. Org. Chem.* **2024**, *20*, 1967–1972. [doi:10.3762/bjoc.20.172](https://doi.org/10.3762/bjoc.20.172)

**Experimental procedures, compound characterization data including NMR and MS spectra, additional crystal data and details from DFT calculations**

## Table of Contents

|                                                    |     |
|----------------------------------------------------|-----|
| 1. Instrumentation and materials .....             | S2  |
| 2. Experimental procedures and compound data ..... | S3  |
| 3. NMR spectra .....                               | S5  |
| 4. Mass spectra .....                              | S9  |
| 5. Crystal data.....                               | S11 |
| 6. DFT Calculations .....                          | S12 |
| 7. References .....                                | S22 |

## 1. Instrumentation and materials

---

$^1\text{H}$  NMR (500 MHz) and  $^{13}\text{C}$  NMR (126 MHz) spectra were recorded on a Bruker AVANCE III HD spectrometer. Chemical shifts were reported as the delta scale in ppm relative to  $\text{CHCl}_3$  ( $\delta = 7.26$  ppm) for  $^1\text{H}$  NMR and  $\text{CDCl}_3$  ( $\delta = 77.16$  ppm) for  $^{13}\text{C}$  NMR.

UV–vis–NIR absorption spectra were recorded on a Shimadzu UV-2550 or JASCO V 670 spectrometer.

High-resolution and electron spray ionization time-of-flight (ESI-TOF) mass spectra were taken on a Bruker micrOTOF instrument using a positive ionization mode.

X-ray data were obtained using a Bruker D8 QUEST X-ray diffractometer with an  $\text{I}\mu\text{S}$  microfocus X-ray source and a PHOTON II detector.

Cyclic voltammograms were obtained under the following conditions: solvent:  $\text{CH}_2\text{Cl}_2$ , electrolyte: 0.1 M  $\text{Bu}_4\text{NPF}_6$ , working electrode: glassy carbon, counter electrode: Pt, reference electrode:  $\text{Ag}/\text{AgNO}_3$ , scan rate:  $50 \text{ mV s}^{-1}$ .

Dry toluene was purchased from KANTO CHEMICAL CO., INC. as a dehydrated grade. AIBN and V-40 were purchased from Wako Pure Chemical Industries, Ltd. Ni(II) mesitylnorcorrole **1** was prepared according to the literature.<sup>1</sup>

Unless otherwise noted, materials obtained from commercial suppliers were used without further purification.

## 2. Experimental procedures and compound data

---

### Synthesis of dialkylated macrocycle **2a**

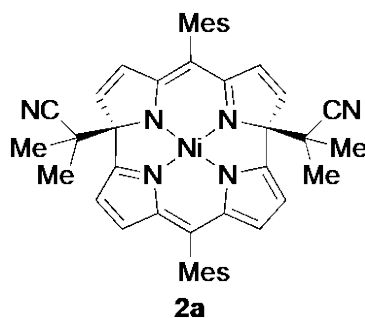

To a Schlenk flask was added compound **1** (23.0 mg, 40  $\mu\text{mol}$ ), AIBN (13.2 mg, 80  $\mu\text{mol}$ ) and dry toluene (4 mL) under  $\text{N}_2$  atmosphere. The reaction mixture was stirred at reflux for 1 h. After removing the solvent in vacuo, the mixture was purified by PTLC (eluent:  $\text{CH}_2\text{Cl}_2/\text{hexane} = 1:2$ ) and compound **2a** (26.2 mg, 37  $\mu\text{mol}$ , 92%) was obtained as a maroon solid.

$^1\text{H}$  NMR (500 MHz,  $\text{CDCl}_3$ , 298 K):  $\delta = 7.19$  (d,  $J = 5.4$  Hz, 2H), 6.93 (s, 1H), 6.92 (s, 1H), 6.91 (s, 1H), 6.87 (s, 1H), 6.49 (d,  $J = 4.2$  Hz, 2H), 6.46 (d,  $J = 4.2$  Hz, 2H), 6.09 (d,  $J = 5.4$  Hz, 2H), 2.34 (s, 3H), 2.31 (s, 3H), 2.19 (s, 3H), 2.18 (s, 3H), 2.14 (s, 3H), 1.86 (s, 3H), 1.60 (s, 6H), 1.42 (s, 6H) ppm;  $^{13}\text{C}$  NMR (126 MHz,  $\text{CDCl}_3$ , 298 K):  $\delta = 174.3, 153.4, 145.8, 145.6, 140.7, 139.0, 137.9, 136.9, 136.4, 136.3, 133.5, 133.3, 132.7, 131.9, 128.3, 128.2, 128.0, 127.9, 127.7, 123.7, 115.2, 98.0, 92.4, 40.1, 24.4, 23.0, 21.3, 21.2, 21.2, 21.2, 20.3, 20.0$ , ppm; HRMS (ESI):  $[\text{M}+\text{Na}]^+$  Calcd for  $(\text{C}_{44}\text{H}_{42}\text{N}_6\text{Ni})\text{Na}^+$ : 735.2717; Found: 735.2721

## Synthesis of dialkylated macrocycle **2b**

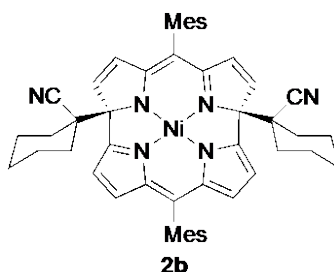

To a Schlenk flask was added compound **1** (23.0 mg, 40  $\mu\text{mol}$ ), V-40 (19.5 mg, 80  $\mu\text{mol}$ ) and dry toluene (4 mL) under  $\text{N}_2$  atmosphere. The reaction mixture was stirred at reflux for 1 h. After removing the solvent in vacuo, the mixture was purified by PTLC (eluent:  $\text{CH}_2\text{Cl}_2/\text{hexane} = 1:1$ ) and compound **2b** (27.4 mg, 35  $\mu\text{mol}$ , 87%) was obtained as a maroon solid.

$^1\text{H}$  NMR (500 MHz,  $\text{CDCl}_3$ , 298 K):  $\delta = 7.18$  (d,  $J = 5.4$  Hz, 2H), 6.93–6.90 (m, 3H), 6.86 (s, 1H), 6.49 (d,  $J = 4.3$  Hz, 2H), 6.44 (d,  $J = 4.3$  Hz, 2H), 6.06 (d,  $J = 5.4$  Hz, 2H), 2.33 (s, 3H), 2.30 (s, 3H), 2.24–2.15 (m, 13H), 1.94–1.86 (m, 2H), 1.85–1.78 (m, 2H), 1.82 (s, 3H), 1.78–1.69 (m, 4H), 1.69–1.58 (m, 4H), 1.32–1.22 (m, 4H) ppm;  $^{13}\text{C}$  NMR (126 MHz,  $\text{CDCl}_3$ , 298 K):  $\delta = 174.7$ , 153.6, 145.8, 145.3, 140.7, 139.1, 137.8, 136.8, 136.5, 136.4, 133.7, 133.4, 132.6, 132.0, 128.2, 128.2, 128.0, 127.9, 127.7, 122.1, 115.3, 98.2, 92.9, 47.4, 32.4, 30.6, 25.0, 23.7, 23.4, 21.5, 21.3, 21.2, 21.1, 20.5, 19.9 ppm; HRMS (ESI):  $[\text{M}+\text{Na}]^+$  Calcd for  $(\text{C}_{50}\text{H}_{50}\text{N}_6\text{Ni})\text{Na}^+$ : 815.3343; Found: 815.3348

### 3. NMR spectra

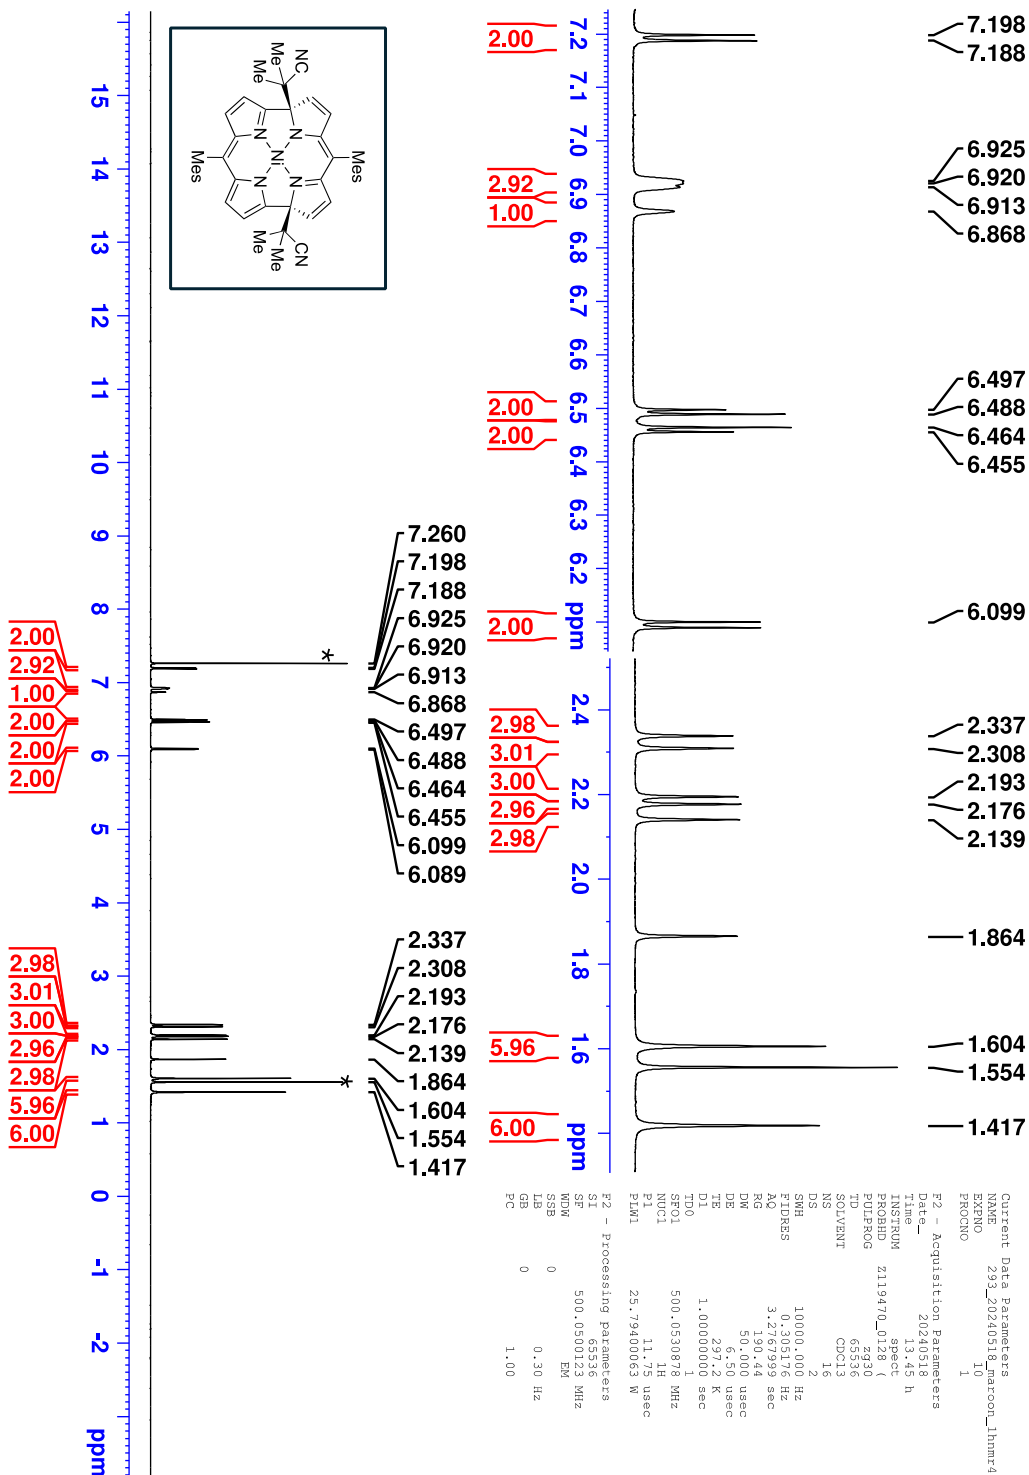

Figure S1. <sup>1</sup>H NMR spectrum of **2a** in CDCl<sub>3</sub> at 25 °C.

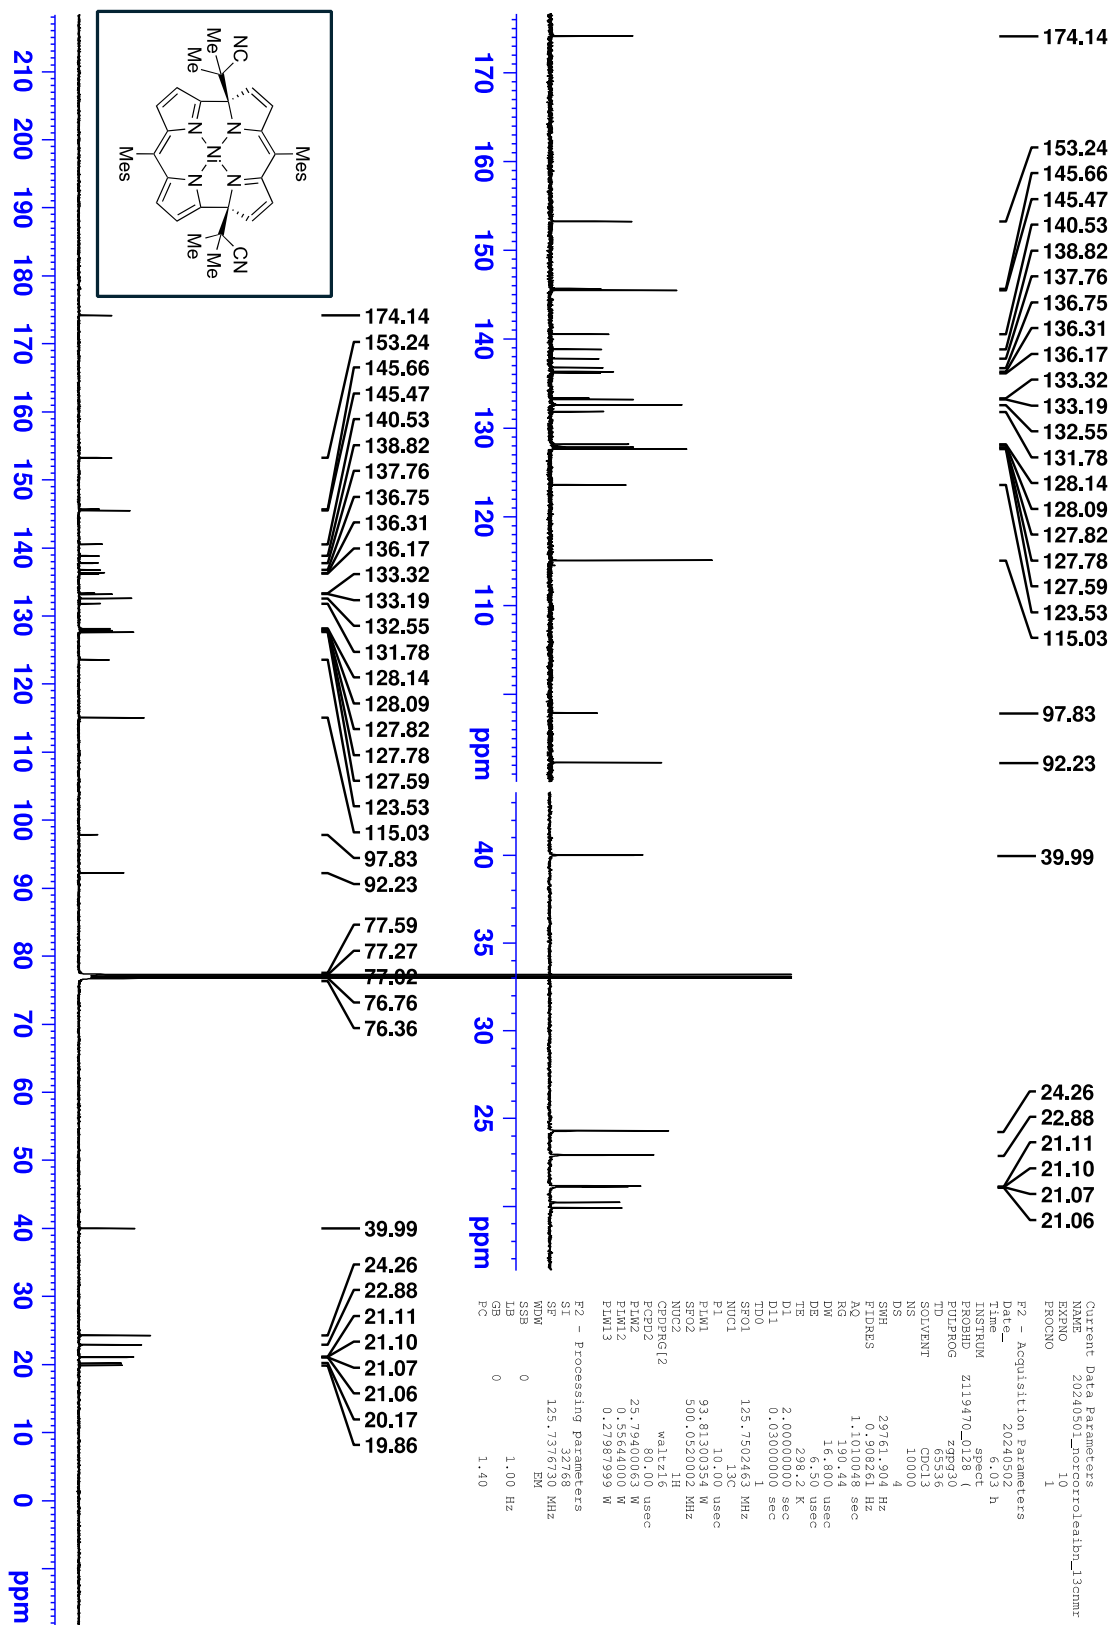

Figure S2.  $^{13}\text{C}$  NMR spectrum of **2a** in  $\text{CDCl}_3$  at  $25^\circ\text{C}$ .

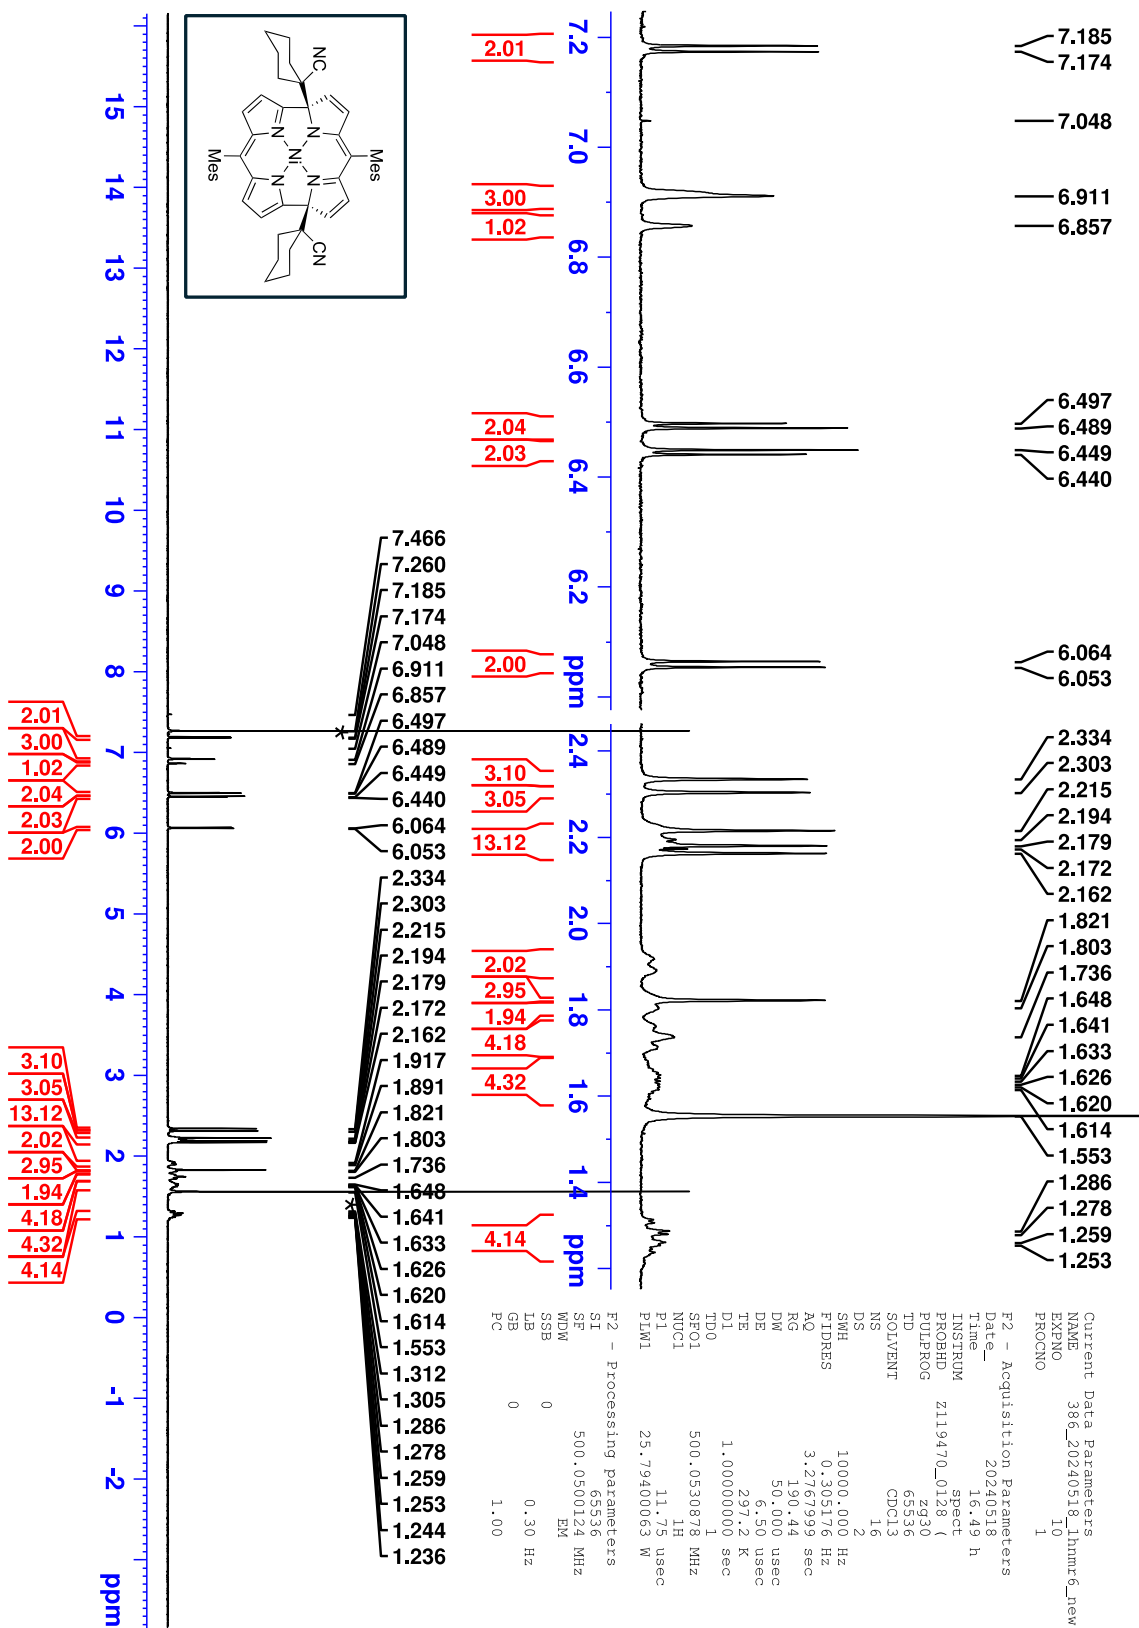

Figure S3.  $^1\text{H}$  NMR spectrum of **2b** in  $\text{CDCl}_3$  at  $25^\circ\text{C}$ .



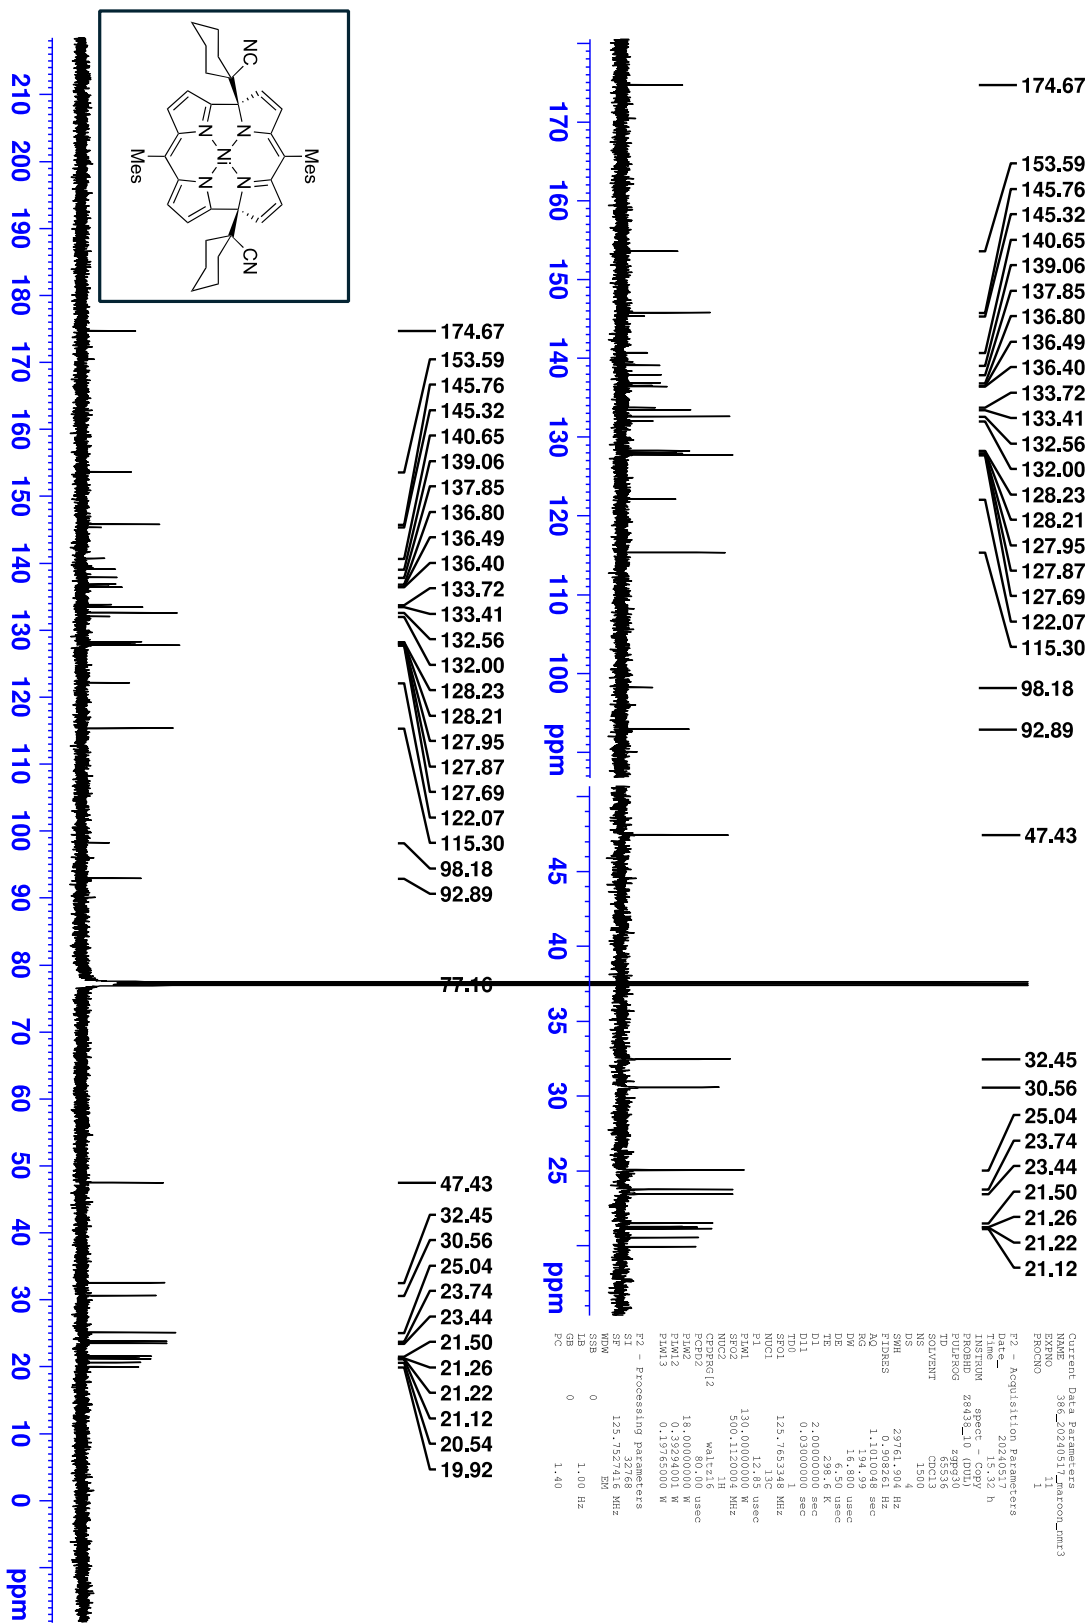

Figure S4. <sup>13</sup>C NMR spectrum of **2b** in CDCl<sub>3</sub> at 25 °C.

## 4. Mass spectra

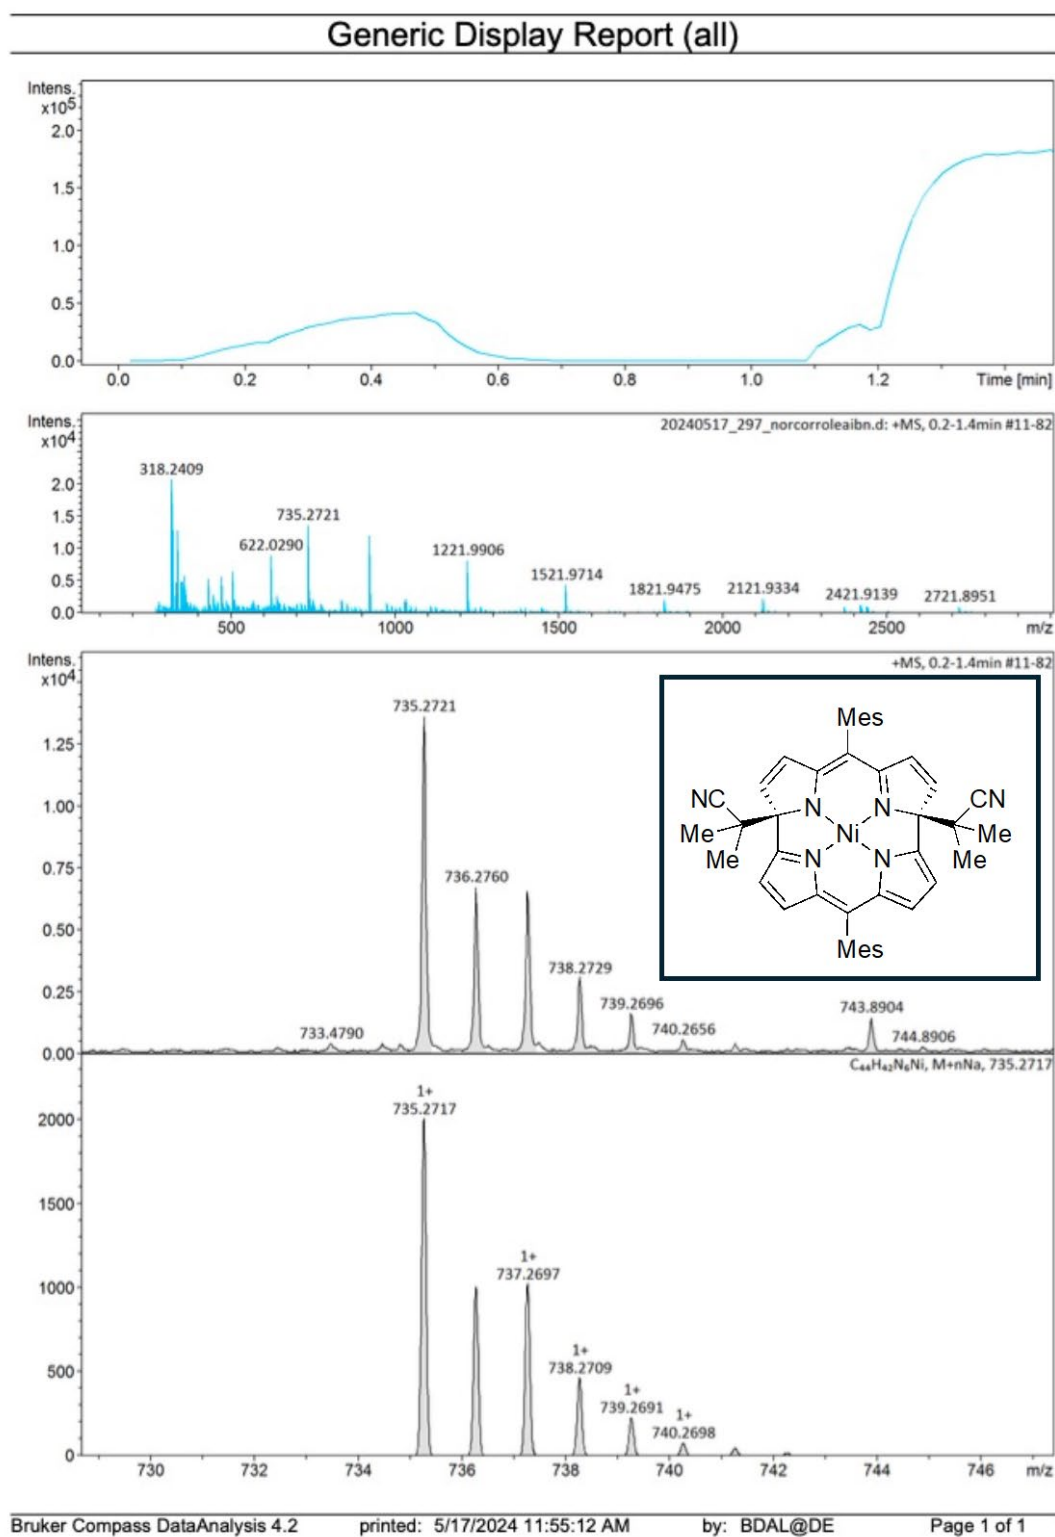

**Figure S5.** ESI-TOF mass spectrum of **2a**.

## Generic Display Report (all)

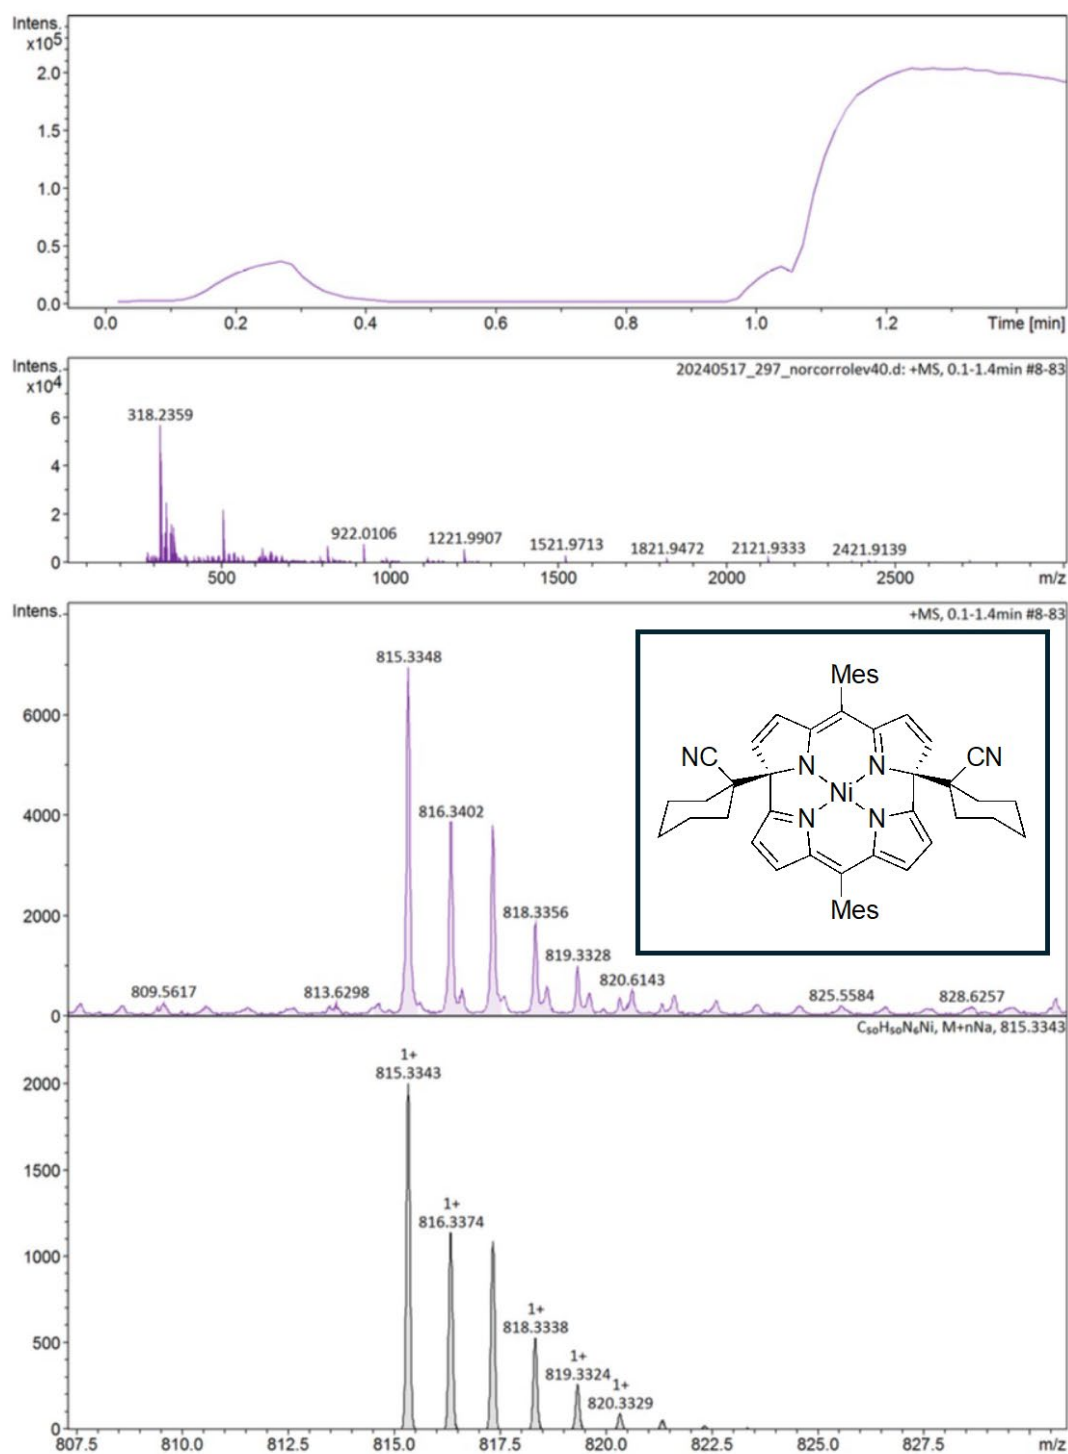

**Figure S6.** ESI-TOF mass spectrum of **2b**.

## 5. Crystal data

---

**Crystallographic data for 2a:** Single crystals were obtained by vapour diffusion of acetonitrile into a chloroform solution of **2a**.  $C_{44}H_{42}N_6Ni$ ,  $M_w = 713.54$ , monoclinic, space group  $P2_1/c$ ,  $a = 23.594(5)$ ,  $b = 15.092(5)$ ,  $c = 10.888(5)$  Å,  $\alpha = \gamma = 90.000(5)^\circ$ ,  $\beta = 101.917(4)^\circ$ ,  $V = 3793(2)$  Å<sup>3</sup>,  $Z = 4$ ,  $D_{calc} = 1.249$  g/cm<sup>3</sup>,  $T = 93$  K,  $R_1 = 0.0433$  ( $I > 2.0 \sigma(I)$ ),  $wR_2 = 0.0945$  (all data), GOF = 1.037, CCDC No. = 2356750.

**Table S1.** Crystallographic data of **2a**

| compound                         | <b>2a</b>           |
|----------------------------------|---------------------|
| Formula                          | $C_{44}H_{42}N_6Ni$ |
| Formula weight                   | 713.54              |
| Crystal system                   | monoclinic          |
| Space group                      | $P2_1/c$ (No. 14)   |
| Crystal color                    | green               |
| Crystal description              | block               |
| $a$ [Å]                          | 23.594(5)           |
| $b$ [Å]                          | 15.092(5)           |
| $c$ [Å]                          | 10.888(5)           |
| $\alpha$ [°]                     | 90.000(5)           |
| $\beta$ [°]                      | 101.917(4)          |
| $\gamma$ [°]                     | 90.000(5)           |
| $V$ [Å <sup>3</sup> ]            | 3793.(2)            |
| $Z$                              | 4                   |
| $d_{calc}$ [g cm <sup>-3</sup> ] | 1.249               |
| $R_1$ ( $I > 2\sigma(I)$ )       | 0.0433              |
| $wR_2$ (all data)                | 0.0945              |
| Goodness-of-fit                  | 1.037               |
| Temperature [K]                  | 93(2)               |
| Solvent                          | $CHCl_3/MeCN$       |
| CCDC No.                         | 2356750             |

---

## 6. DFT Calculations

---

### Cartesian coordinate of the optimized structures

#### Isobutyronitrile radical

|   |             |            |             |
|---|-------------|------------|-------------|
| C | -1.32841100 | 3.08648100 | 0.26478700  |
| C | 0.15290600  | 2.95254200 | 0.46721800  |
| H | -1.72947300 | 3.99366900 | 0.72299500  |
| H | -1.56999700 | 3.10297900 | -0.80803400 |
| H | -1.85469400 | 2.21993900 | 0.69106400  |
| C | 0.86450200  | 1.75908900 | -0.10069700 |
| H | 1.93605500  | 1.77480700 | 0.11219100  |
| H | 0.44256000  | 0.82932800 | 0.30806900  |
| H | 0.72743000  | 1.71247200 | -1.19093400 |
| C | 0.85769700  | 3.92266800 | 1.17260600  |
| N | 1.45376700  | 4.74315100 | 1.76919200  |

#### Norcorrole (1)

|   |             |             |             |
|---|-------------|-------------|-------------|
| C | 0.74868700  | 2.56943500  | 0.49147600  |
| C | 1.86096300  | 3.41251400  | 0.18722600  |
| C | 2.99609000  | 2.59730200  | 0.17826000  |
| C | 2.57314500  | 1.25511100  | 0.46876400  |
| N | 1.22006700  | 1.32519300  | 0.68673700  |
| H | 1.82830700  | 4.47491100  | -0.01432000 |
| H | 4.01308600  | 2.90312500  | -0.02937600 |
| C | -0.74597800 | 2.57016500  | 0.49177000  |
| C | -1.85754600 | 3.41432500  | 0.18794000  |
| N | -1.21849600 | 1.32638400  | 0.68722700  |
| C | -2.99347200 | 2.60021900  | 0.17941900  |
| H | -1.82393300 | 4.47668600  | -0.01363300 |
| C | -2.57172500 | 1.25762100  | 0.46977900  |
| H | -4.01024800 | 2.90702800  | -0.02783300 |
| C | 2.57201500  | -1.25790800 | 0.46962700  |
| C | 2.99375500  | -2.60091900 | 0.18117700  |
| C | 1.85779700  | -3.41496100 | 0.19039800  |

|    |             |             |             |
|----|-------------|-------------|-------------|
| C  | 0.74618300  | -2.57036800 | 0.49294500  |
| N  | 1.21870700  | -1.32637000 | 0.68673700  |
| H  | 4.01058100  | -2.90808500 | -0.02525300 |
| H  | 1.82420400  | -4.47760000 | -0.00971100 |
| C  | -0.74849300 | -2.56963700 | 0.49324900  |
| C  | -1.86105800 | -3.41315100 | 0.19117700  |
| N  | -1.21972300 | -1.32517800 | 0.68721800  |
| C  | -2.99622400 | -2.59800300 | 0.18242100  |
| H  | -1.82858400 | -4.47582600 | -0.00892900 |
| C  | -2.57305500 | -1.25539800 | 0.47067100  |
| H  | -4.01343600 | -2.90418200 | -0.02357700 |
| C  | 3.23732100  | -0.00174300 | 0.37771400  |
| C  | -3.23716800 | 0.00141400  | 0.37901200  |
| Ni | 0.00016000  | 0.00002800  | 0.79164500  |
| C  | 4.69905900  | -0.00250900 | 0.07036300  |
| C  | 5.13292900  | -0.00776900 | -1.26948200 |
| C  | 5.62815600  | 0.00773200  | 1.12824700  |
| C  | 6.50708300  | -0.00415700 | -1.52825000 |
| C  | 6.99239700  | 0.01085700  | 0.82296200  |
| C  | 7.45202000  | 0.00193200  | -0.49762500 |
| H  | 6.84678700  | -0.00473600 | -2.56212300 |
| H  | 7.71332800  | 0.02179100  | 1.63811000  |
| C  | -4.69902800 | 0.00208000  | 0.07224800  |
| C  | -5.62769000 | 0.01361500  | 1.13050100  |
| C  | -5.13344200 | -0.00312700 | -1.26742100 |
| C  | -6.99204900 | 0.01806600  | 0.82576200  |
| C  | -6.50769600 | 0.00184300  | -1.52564000 |
| C  | -7.45221200 | 0.00922400  | -0.49463800 |
| H  | -7.71264100 | 0.02999100  | 1.64119600  |
| H  | -6.84781600 | 0.00132000  | -2.55937600 |
| C  | -5.15427500 | 0.02499200  | 2.56593400  |
| H  | -4.53459100 | -0.85287300 | 2.78462500  |
| H  | -4.53541500 | 0.90660700  | 2.77137000  |

|   |             |             |             |
|---|-------------|-------------|-------------|
| H | -5.99814400 | 0.02975900  | 3.26238400  |
| C | -4.13397700 | -0.00882400 | -2.40155600 |
| H | -3.47919900 | 0.86942100  | -2.35540400 |
| H | -3.48470200 | -0.89087100 | -2.35108600 |
| H | -4.63755800 | -0.00967000 | -3.37294000 |
| C | -8.93206800 | -0.02063400 | -0.79903900 |
| H | -9.30127200 | -1.05314300 | -0.86156000 |
| H | -9.51265200 | 0.48508900  | -0.01981200 |
| H | -9.15508600 | 0.46263700  | -1.75647500 |
| C | 4.13300300  | -0.01210300 | -2.40321600 |
| H | 3.48267900  | -0.89336800 | -2.35260200 |
| H | 3.47931000  | 0.86693000  | -2.35668400 |
| H | 4.63619300  | -0.01343100 | -3.37480200 |
| C | 5.15532800  | 0.01917800  | 2.56387300  |
| H | 4.53739300  | 0.90133000  | 2.76979200  |
| H | 4.53489200  | -0.85815200 | 2.78257900  |
| H | 5.99948000  | 0.02295400  | 3.25998500  |
| C | 8.93172100  | -0.02937900 | -0.80263400 |
| H | 9.29980000  | -1.06225400 | -0.86572200 |
| H | 9.15486700  | 0.45404000  | -1.75996600 |
| H | 9.51315600  | 0.47541200  | -0.02343900 |

Intermediate I

|   |             |            |             |
|---|-------------|------------|-------------|
| C | 0.77559600  | 2.53266100 | -1.23699100 |
| C | 1.81163500  | 3.19846700 | -0.35442000 |
| C | 2.82628300  | 2.33689900 | -0.13757000 |
| C | 2.46827200  | 1.03008700 | -0.71483700 |
| N | 1.28813600  | 1.15040500 | -1.33767400 |
| H | 1.76272600  | 4.23975100 | -0.06018200 |
| H | 3.74172700  | 2.52484500 | 0.40956100  |
| C | -0.67273300 | 2.40800000 | -0.75869800 |
| C | -1.71647800 | 3.26963900 | -0.31633700 |
| N | -1.15832000 | 1.16355200 | -0.87192400 |
| C | -2.84275000 | 2.46445200 | -0.13975600 |

|    |             |             |             |
|----|-------------|-------------|-------------|
| H  | -1.64216500 | 4.33696100  | -0.16109800 |
| C  | -2.47476400 | 1.11671700  | -0.47191100 |
| H  | -3.81793600 | 2.77578900  | 0.21076000  |
| C  | 2.53260400  | -1.45552700 | -0.70346000 |
| C  | 2.92626100  | -2.78907300 | -0.28891100 |
| C  | 1.79228200  | -3.58562100 | -0.30837100 |
| C  | 0.70775300  | -2.75947100 | -0.75366600 |
| N  | 1.21943400  | -1.53304000 | -1.06534000 |
| H  | 3.92183700  | -3.07316700 | 0.02510300  |
| H  | 1.72403200  | -4.62427400 | -0.01234600 |
| C  | -0.73787300 | -2.71970200 | -0.65831100 |
| C  | -1.82887700 | -3.53057600 | -0.19842600 |
| N  | -1.21056300 | -1.46457300 | -0.85914400 |
| C  | -2.93508400 | -2.70038000 | -0.09679100 |
| H  | -1.78537900 | -4.58525500 | 0.03955000  |
| C  | -2.52252100 | -1.37071700 | -0.47687900 |
| H  | -3.92644400 | -2.97009000 | 0.24237500  |
| C  | 3.16843200  | -0.20456400 | -0.51562300 |
| C  | -3.15782100 | -0.11635200 | -0.30568800 |
| Ni | 0.02045900  | -0.16929300 | -1.19051700 |
| C  | 4.54438200  | -0.15306300 | 0.06445600  |
| C  | 5.64877000  | 0.07943700  | -0.78014400 |
| C  | 4.73654700  | -0.31223900 | 1.45279700  |
| C  | 6.93106100  | 0.13238700  | -0.22566300 |
| C  | 6.03549200  | -0.25052700 | 1.96819500  |
| C  | 7.14584600  | -0.03585900 | 1.14586100  |
| H  | 7.78265400  | 0.31019300  | -0.87971000 |
| H  | 6.18316400  | -0.36760800 | 3.04014700  |
| C  | -4.57192100 | -0.08842200 | 0.17551400  |
| C  | -4.84206500 | -0.08224100 | 1.55788600  |
| C  | -5.62291000 | -0.05960100 | -0.76104100 |
| C  | -6.17433400 | -0.05040000 | 1.98159300  |
| C  | -6.94011900 | -0.02796100 | -0.29377500 |



|   |             |             |             |
|---|-------------|-------------|-------------|
| C | -7.23673700 | -0.02609800 | 1.07278400  |
| H | -6.38663100 | -0.04241000 | 3.04893000  |
| H | -7.75417200 | -0.00214700 | -1.01558400 |
| C | -3.71275800 | -0.10613400 | 2.56264900  |
| H | -3.09774500 | -1.00630000 | 2.44469900  |
| H | -3.04507200 | 0.75292400  | 2.42726200  |
| H | -4.09444300 | -0.08490500 | 3.58790400  |
| C | -5.32781700 | -0.05565100 | -2.24354300 |
| H | -4.72778300 | 0.81824500  | -2.52457300 |
| H | -4.75037900 | -0.94116200 | -2.53504300 |
| H | -6.25008400 | -0.04004900 | -2.83217400 |
| C | -8.66905500 | -0.02611900 | 1.55448400  |
| H | -9.04955600 | -1.05088800 | 1.66130200  |
| H | -8.76417500 | 0.45929800  | 2.53186200  |
| H | -9.32917300 | 0.49355100  | 0.85147100  |
| C | 5.44626900  | 0.27510900  | -2.26583400 |
| H | 4.89516100  | -0.56388500 | -2.70640900 |
| H | 4.85819300  | 1.17837100  | -2.47285800 |
| H | 6.40329800  | 0.37002200  | -2.78828200 |
| C | 3.55766100  | -0.52492600 | 2.37594300  |
| H | 2.80164000  | 0.25848900  | 2.24334600  |
| H | 3.05704200  | -1.47838400 | 2.17132400  |
| H | 3.87159900  | -0.52225700 | 3.42436300  |
| C | 8.54314100  | -0.01001300 | 1.72063100  |
| H | 8.98855400  | -1.01398200 | 1.72007700  |
| H | 9.20568900  | 0.63908900  | 1.13768600  |
| H | 8.54494400  | 0.34526900  | 2.75689000  |
| C | 0.77943500  | 3.20954500  | -2.69950200 |
| C | 2.18363500  | 3.16735700  | -3.34213500 |
| H | 2.92761400  | 3.68794400  | -2.73566100 |
| H | 2.49070500  | 2.12462900  | -3.46003500 |
| H | 2.15214100  | 3.63701600  | -4.32976600 |
| C | -0.23331500 | 2.50869500  | -3.63243900 |

|           |             |             |             |
|-----------|-------------|-------------|-------------|
| H         | 0.01536500  | 1.44541700  | -3.69370200 |
| H         | -1.25726700 | 2.60415900  | -3.26581500 |
| H         | -0.17786900 | 2.94779500  | -4.63332300 |
| C         | 0.37823800  | 4.61554000  | -2.51260500 |
| N         | 0.07129300  | 5.72141200  | -2.33472600 |
| <b>2a</b> |             |             |             |
| C         | 0.69601100  | 2.73481100  | -0.78956600 |
| C         | 1.67288600  | 3.40389400  | 0.15449700  |
| C         | 2.65303600  | 2.53697900  | 0.46566500  |
| C         | 2.33329900  | 1.23008700  | -0.13964100 |
| N         | 1.24174700  | 1.36830200  | -0.90985100 |
| H         | 1.59538300  | 4.44367200  | 0.44893900  |
| H         | 3.51151900  | 2.71306200  | 1.10159800  |
| C         | -0.73583200 | 2.56429500  | -0.28823900 |
| C         | -1.77476400 | 3.40458400  | 0.20685700  |
| N         | -1.18711500 | 1.30995400  | -0.36991200 |
| C         | -2.86775300 | 2.57588100  | 0.44963000  |
| H         | -1.71403600 | 4.47414400  | 0.35230800  |
| C         | -2.48361500 | 1.23911000  | 0.10551400  |
| H         | -3.82851600 | 2.86171300  | 0.85692600  |
| C         | 2.33199200  | -1.23318400 | -0.14541200 |
| C         | 2.65035000  | -2.54364100 | 0.45287700  |
| C         | 1.66918900  | -3.40781800 | 0.13735000  |
| C         | 0.69299300  | -2.73273500 | -0.80313500 |
| N         | 1.24026200  | -1.36628400 | -0.91634500 |
| H         | 3.50872800  | -2.72402000 | 1.08774000  |
| H         | 1.59060800  | -4.44904800 | 0.42632400  |
| C         | -0.73865000 | -2.56319800 | -0.30089900 |
| C         | -1.77867300 | -3.40489200 | 0.18950600  |
| N         | -1.18848100 | -1.30793600 | -0.37607000 |
| C         | -2.87081100 | -2.57623700 | 0.43622300  |
| H         | -1.71921600 | -4.47527700 | 0.32929600  |
| C         | -2.48506800 | -1.23810900 | 0.09928400  |

|    |             |             |             |
|----|-------------|-------------|-------------|
| H  | -3.83205600 | -2.86314100 | 0.84159900  |
| C  | 2.94779900  | -0.00269400 | 0.19134800  |
| C  | -3.12630800 | 0.00033700  | 0.31765000  |
| Ni | -0.00981800 | 0.00149100  | -0.83308300 |
| C  | 4.14626400  | -0.00483200 | 1.08859900  |
| C  | 5.44323900  | 0.00952600  | 0.53716800  |
| C  | 3.98000600  | -0.01434000 | 2.48989100  |
| C  | 6.55095200  | 0.01199700  | 1.39110600  |
| C  | 5.11159600  | -0.01172300 | 3.31225800  |
| C  | 6.40565800  | -0.00184800 | 2.78189500  |
| H  | 7.55097200  | 0.02630500  | 0.96151300  |
| H  | 4.98041300  | -0.01575800 | 4.39279300  |
| C  | -4.51244700 | -0.00027200 | 0.87505500  |
| C  | -4.70341600 | -0.00531400 | 2.27018800  |
| C  | -5.61291700 | 0.00976800  | -0.00262800 |
| C  | -6.01031800 | -0.00151900 | 2.76715900  |
| C  | -6.90216800 | 0.01317500  | 0.53789100  |
| C  | -7.12197500 | 0.00456400  | 1.91884500  |
| H  | -6.16285800 | -0.00199800 | 3.84462000  |
| H  | -7.75549800 | 0.02408600  | -0.13729800 |
| C  | -3.51900400 | -0.00998800 | 3.20964100  |
| H  | -2.88724200 | -0.89084100 | 3.04435400  |
| H  | -2.88422600 | 0.86974000  | 3.04988700  |
| H  | -3.84270000 | -0.01276200 | 4.25474200  |
| C  | -5.40106800 | 0.02101800  | -1.49925800 |
| H  | -4.82992500 | 0.90368200  | -1.81125100 |
| H  | -4.82977000 | -0.85690800 | -1.82408400 |
| H  | -6.35488800 | 0.02479500  | -2.03522300 |
| C  | -8.52471100 | -0.02640300 | 2.47981000  |
| H  | -8.87351500 | -1.05935000 | 2.61231500  |
| H  | -8.57660000 | 0.46218400  | 3.45883600  |
| H  | -9.23524800 | 0.47335000  | 1.81252200  |
| C  | 5.63217500  | 0.02707600  | -0.96281500 |

|   |             |             |             |
|---|-------------|-------------|-------------|
| H | 5.16467400  | -0.84630800 | -1.43346600 |
| H | 5.16182800  | 0.90939100  | -1.41373500 |
| H | 6.69353500  | 0.03205400  | -1.23060900 |
| C | 2.59409600  | -0.02193700 | 3.09544700  |
| H | 2.01428900  | 0.85367200  | 2.77926300  |
| H | 2.02278900  | -0.90222300 | 2.77676900  |
| H | 2.63932600  | -0.02354300 | 4.18904800  |
| C | 7.61493900  | -0.03403000 | 3.68774700  |
| H | 7.91903100  | -1.06700900 | 3.90436600  |
| H | 8.47412700  | 0.46757600  | 3.22916600  |
| H | 7.41071700  | 0.45197800  | 4.64806100  |
| C | 0.69147000  | 3.44929500  | -2.22089900 |
| C | 2.10961100  | 3.47494200  | -2.83179800 |
| H | 2.81830500  | 4.00656400  | -2.19262700 |
| H | 2.45640300  | 2.44618000  | -2.96102000 |
| H | 2.08698300  | 3.96695500  | -3.80881800 |
| C | -0.27809800 | 2.73156700  | -3.18569200 |
| H | 0.02334100  | 1.68398200  | -3.27647400 |
| H | -1.30791300 | 2.76552600  | -2.82326800 |
| H | -0.23822500 | 3.20204200  | -4.17293200 |
| C | 0.23207800  | 4.83398100  | -2.00892900 |
| N | -0.12103600 | 5.92205900  | -1.80843100 |
| C | 0.68753600  | -3.43983600 | -2.23813600 |
| C | 2.10561100  | -3.46407500 | -2.84924500 |
| C | -0.28115700 | -2.71597500 | -3.19921900 |
| H | 2.81368500  | -3.99988800 | -2.21290200 |
| H | 2.08230000  | -3.95096400 | -3.82881300 |
| H | 2.45366600  | -2.43508300 | -2.97312200 |
| H | -1.31096900 | -2.75020300 | -2.83680600 |
| H | 0.02181800  | -1.66840400 | -3.28492400 |
| H | -0.24211500 | -3.18165000 | -4.18876600 |
| C | 0.22650200  | -4.82504600 | -2.03327300 |
| N | -0.12784000 | -5.91373300 | -1.83831300 |

**Selected absorption wavelengths, energies, and oscillator strengths (f) of 2a calculated at the M06/6-31G(d)+SDD//B3LYP-D3/6-31G(d)+SDD level of theory.**

|               |           |           |           |           |          |              |
|---------------|-----------|-----------|-----------|-----------|----------|--------------|
| Excited State | 1:        | Singlet-A | 1.8500 eV | 670.17 nm | f=0.0026 | <S**2>=0.000 |
|               | 169 ->185 | 0.11936   |           |           |          |              |
|               | 169 ->188 | -0.19458  |           |           |          |              |
|               | 173 ->188 | 0.13363   |           |           |          |              |
|               | 178 ->185 | 0.15996   |           |           |          |              |
|               | 178 ->188 | -0.22009  |           |           |          |              |
|               | 183 ->185 | 0.46660   |           |           |          |              |
|               | 183 ->188 | -0.34879  |           |           |          |              |

This state for optimization and/or second-order correction.

Total Energy, E(TD-HF/TD-DFT) = -2199.89793617

Copying the excited state density for this state as the 1-particle RhoCI density.

|               |           |           |           |           |          |              |
|---------------|-----------|-----------|-----------|-----------|----------|--------------|
| Excited State | 2:        | Singlet-A | 2.1748 eV | 570.09 nm | f=0.0042 | <S**2>=0.000 |
|               | 170 ->185 | -0.12632  |           |           |          |              |
|               | 170 ->188 | 0.21684   |           |           |          |              |
|               | 174 ->188 | 0.13791   |           |           |          |              |
|               | 181 ->185 | -0.38318  |           |           |          |              |
|               | 181 ->188 | 0.45789   |           |           |          |              |
|               | 183 ->184 | -0.17508  |           |           |          |              |

|               |           |           |           |           |          |              |
|---------------|-----------|-----------|-----------|-----------|----------|--------------|
| Excited State | 3:        | Singlet-A | 2.1957 eV | 564.67 nm | f=0.0000 | <S**2>=0.000 |
|               | 175 ->185 | -0.40637  |           |           |          |              |
|               | 175 ->188 | 0.52789   |           |           |          |              |
|               | 178 ->185 | -0.12213  |           |           |          |              |
|               | 178 ->188 | 0.16151   |           |           |          |              |
|               | 175 <-188 | -0.10937  |           |           |          |              |

|               |           |           |           |           |          |              |
|---------------|-----------|-----------|-----------|-----------|----------|--------------|
| Excited State | 4:        | Singlet-A | 2.2784 eV | 544.17 nm | f=0.0054 | <S**2>=0.000 |
|               | 181 ->188 | 0.12892   |           |           |          |              |
|               | 183 ->184 | 0.68084   |           |           |          |              |

|               |           |           |           |           |          |              |
|---------------|-----------|-----------|-----------|-----------|----------|--------------|
| Excited State | 5:        | Singlet-A | 2.5380 eV | 488.51 nm | f=0.0001 | <S**2>=0.000 |
|               | 171 ->185 | 0.16419   |           |           |          |              |
|               | 171 ->188 | -0.25654  |           |           |          |              |
|               | 172 ->185 | 0.14928   |           |           |          |              |
|               | 172 ->188 | -0.23511  |           |           |          |              |
|               | 173 ->185 | 0.22274   |           |           |          |              |
|               | 173 ->188 | -0.33981  |           |           |          |              |
|               | 178 ->185 | 0.23145   |           |           |          |              |
|               | 178 ->188 | -0.26364  |           |           |          |              |
|               | 182 ->184 | 0.10040   |           |           |          |              |
|               | 183 ->185 | -0.11918  |           |           |          |              |

|               |           |           |           |           |          |              |
|---------------|-----------|-----------|-----------|-----------|----------|--------------|
| Excited State | 6:        | Singlet-A | 2.7064 eV | 458.11 nm | f=0.0360 | <S**2>=0.000 |
|               | 173 ->185 | -0.12028  |           |           |          |              |
|               | 173 ->188 | 0.15877   |           |           |          |              |
|               | 181 ->184 | 0.13044   |           |           |          |              |
|               | 182 ->184 | 0.51325   |           |           |          |              |
|               | 183 ->185 | -0.29729  |           |           |          |              |
|               | 183 ->188 | -0.21415  |           |           |          |              |

## 7. References

---

1. Ito, T.; Hayashi, Y.; Shimizu, S.; Shin, J.-Y.; Kobayashi, N.; Shinokubo, H. *Angew. Chem. Int. Ed.* **2012**, *51*, 8542–8545.
